# Supplementary material for: Mechanism of seasonal Arctic sea ice evolution and Arctic amplification
Source: Copernicus journal article supplement (doi:10.5194/tc-10-2191-2016), 2016-09-22
Supplement: Supplementary file 1 [file tc-10-2191-2016-supplement.pdf]

Supplement of The Cryosphere, 10, 2191–2202, 2016  
<http://www.the-cryosphere.net/10/2191/2016/>  
doi:10.5194/tc-10-2191-2016-supplement  
© Author(s) 2016. CC Attribution 3.0 License.

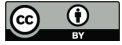

*Supplement of*

## **Mechanism of seasonal Arctic sea ice evolution and Arctic amplification**

**Kwang-Yul Kim et al.**

*Correspondence to:* Kwang-Yul Kim (kwang56@snu.ac.kr)

The copyright of individual parts of the supplement might differ from the CC-BY 3.0 licence.

**a** 850 hPa T (0.2 C) & SAT (0.5 C)

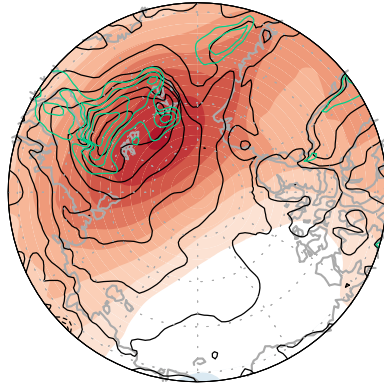

**b** TCC (0.5 %)

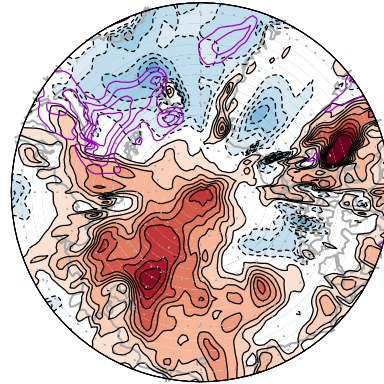

**c** DLW and ULW at SFC (2 W/m<sup>2</sup>)

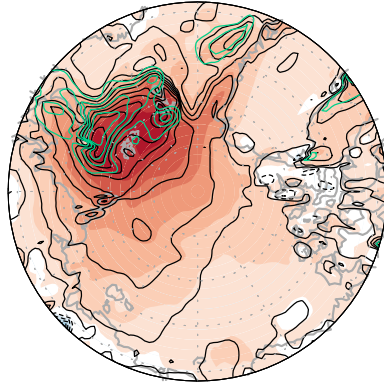

**d** SH (0.02 g/kg) and DLW (2 W/m<sup>2</sup>)

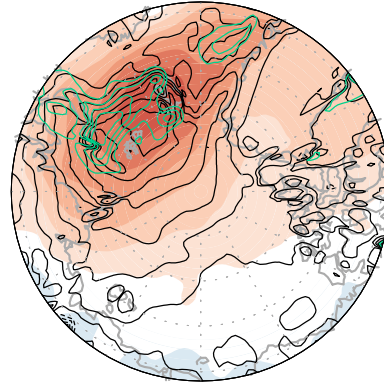

**Figure S1.** The DJF patterns of 850 hPa air temperature (shading) and 2 m air temperature (contour) (a), total cloud cover (b), downward (shade) and upward (contour) longwave radiation at surface (c), and 900-hPa specific humidity (shade) and downward longwave radiation at surface (contour) (d) for the warming mode. The green and purple contours in (a)-(d) represent the reduction of sea ice concentration.

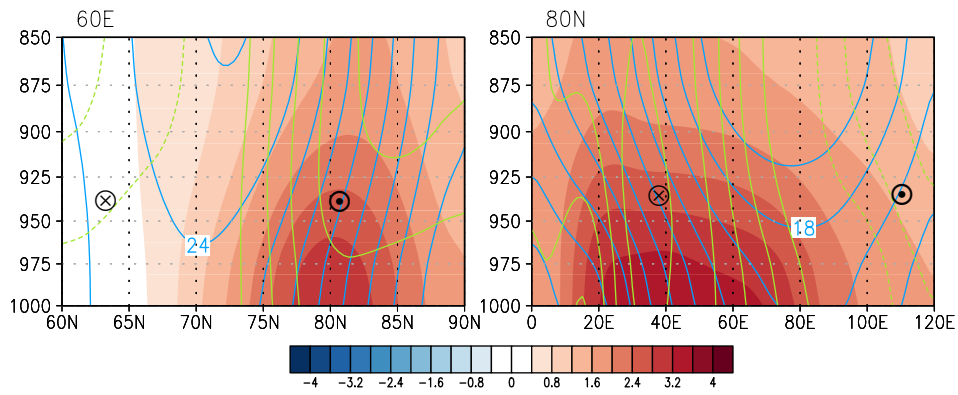

925 hPa AIR T & GPH

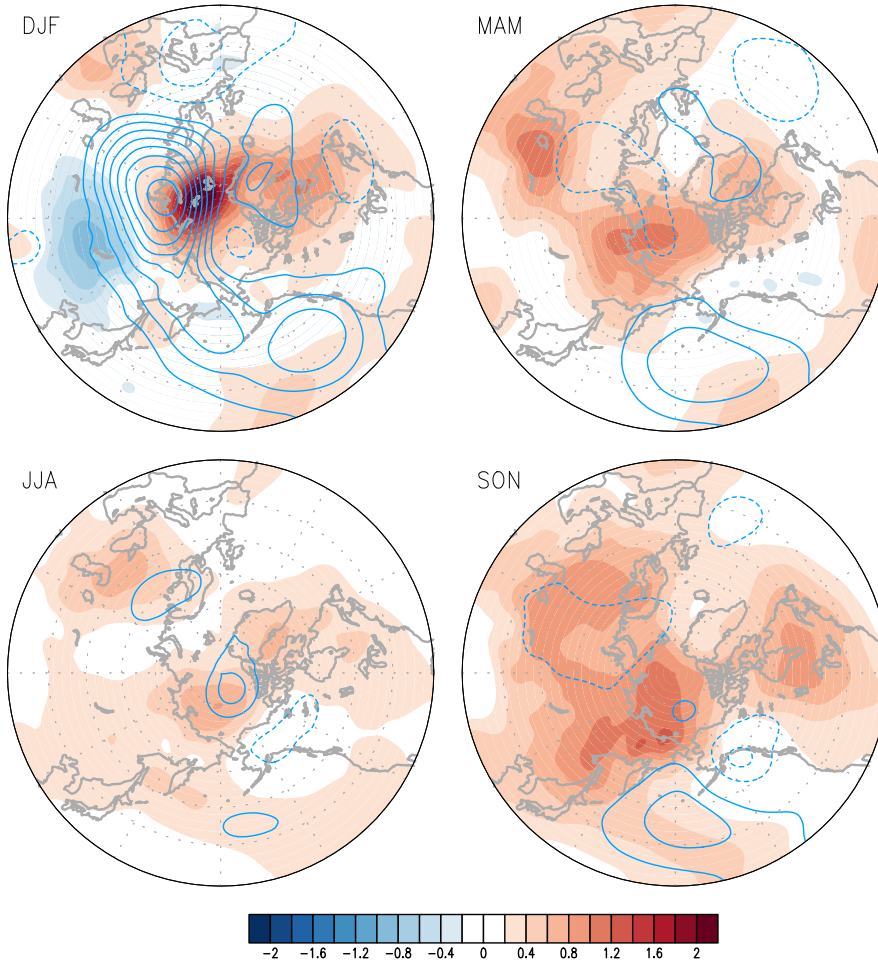

**Figure S2.** (upper panels) Vertical section of temperature (shading; 0.4 K), geopotential height (blue contours; 3 m), and zonal (left) and meridional (right) winds (yellow contours;  $0.2 \text{ m s}^{-1}$ ). (lower panels) Air temperatures (shading; 0.2 K) and geopotential height (contours; 3 m) at 925 hPa level. The domain of the plot is  $30^{\circ}$ - $90^{\circ}$  N.
